# Supplementary material for: In Vitro Influence of Mycophenolic Acid on Selected Parameters of Stimulated Peripheral Canine Lymphocytes
Source: PLOS journal article supplement (doi:10.1371/journal.pone.0154429), 2016-05-03
Supplement: S12 (10.1371/journal.pone.0154429.s012) [file journal.pone.0154429.s012]

**S8 Table. The percentage of CD4<sup>+</sup>CD25<sup>+</sup> T lymphocytes**

after 72 h culture of PBMC in a 37°C, 5% CO<sub>2</sub> environment with mitogens – ConA or PHA and MPA at 1 µM, 10 µM, 100 µM or without MPA (solvent control – 0.1% DMSO). Mean ± SEM (n=7)

| % CD4 <sup>+</sup> CD25 <sup>+</sup> T lymphocytes after culture with mitogens |               |            |
|--------------------------------------------------------------------------------|---------------|------------|
| MPA concentration                                                              | ConA          | PHA        |
| Control                                                                        | 22.8 ± 2.4    | 13.3 ± 2.3 |
| 1 µM                                                                           | 18.9 ± 2.2*   | 11.8 ± 1.7 |
| 10 µM                                                                          | 15.8 ± 2.1*** | 9.1 ± 1.5* |
| 100 µM                                                                         | 15.6 ± 2.2*** | 9.7 ± 1.4* |

\*p<0.05, \*\*\*p<0.001 in comparison with control
